# Supplementary material for: Modulation of the inwardly rectifying potassium channel Kir4.1 by the pro-invasive miR-5096 in glioblastoma cells
Source: PubMed Central journal article supplement (PMC5514940; doi:10.18632/oncotarget.16949), 2017-04-07
Supplement: oncotarget-08-37681-s001.pdf [file oncotarget-08-37681-s001.pdf]

## Modulation of the inwardly rectifying potassium channel Kir4.1 by the pro-invasive miR-5096 in glioblastoma cells

### SUPPLEMENTARY MATERIALS

### SUPPLEMENTARY FIGURE

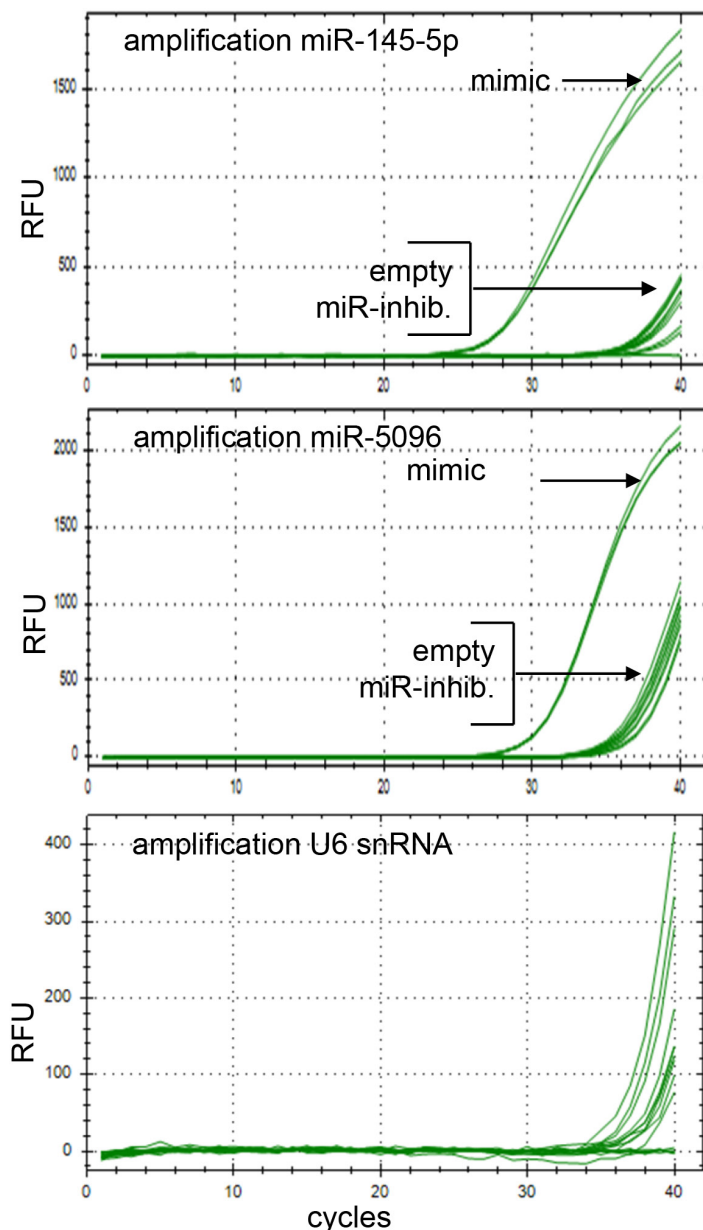

**Supplementary Figure 1: miR-145-5p and miR-5096 are detected in exosomes released from microvascular endothelial cells (HMEC) and glioblastoma cell line (U87), respectively.** Cells were transfected empty, miR-inhibitor (30 nM) or miR-mimic (30 nM), then cultured separately for 48h. Exosomes were collected from supernatants of homotypic cultures of HMEC (miR-145) and U87 (miR-5096). The miR contain was amplified by real-time qPCR (representative amplification curve made in triplicate). Note that U6 snRNA (used an intracellular control) was not detected in exosomes. Thus, levels of miR-145 or -5096 could not be quantified relative to levels of U6 snRNA, as usually made.
